# Supplementary material for: Graphene–CdS quantum dots–polyoxometalate composite films for efficient photoelectrochemical water splitting and pollutant degradation
Source: Royal Society of Chemistry journal article supplement (doi:10.1039/c4cp03824j), 2014-01-01
Supplement: c4cp03824j1.pdf [file c4cp03824j1.pdf]

# Graphene/CdS Quantum Dots/Polyoxometalate Composite Films For Efficient Photoelectrochemical Water splitting and Pollutant Degradation

Meng Wang, <sup>a,b</sup>Xinke Shang<sup>a,b</sup>, Xuelian Yu<sup>a</sup>, Rongji Liu<sup>a</sup>, Guangjin Zhang <sup>a\*</sup>, and Hongbin Cao<sup>a\*</sup>

<sup>a</sup> Key laboratory of Green Process Engineering, Institute of Process Engineering, Chinese Academy of Science,  
100190, Beijing, China

<sup>b</sup> University of Chinese Academy of Sciences, 100049, Beijing, China

## Supplementary Results

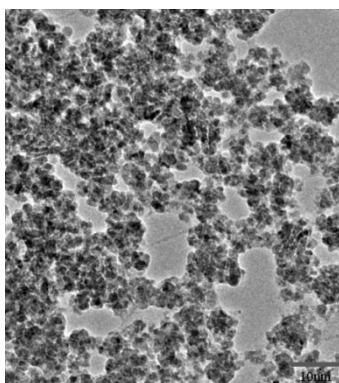

**Figure S1** TEM image of the CdS quantum dots.

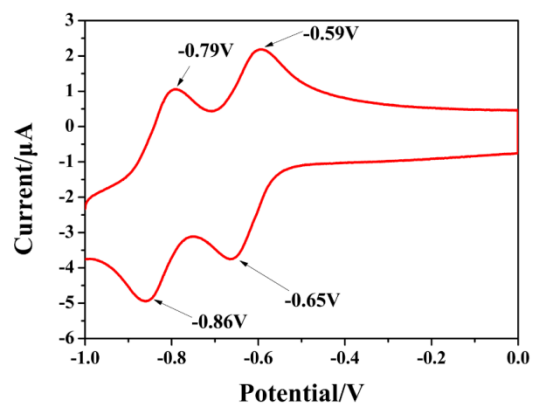

Figure S2 CV curves of 0.5 mM H<sub>2</sub>W<sub>12</sub> in 0.1 M phosphate buffer solution at pH 8.0.

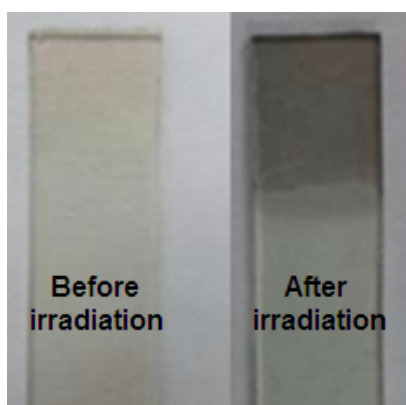

Figure S3 Colors of the composite films before and after UV irradiation.

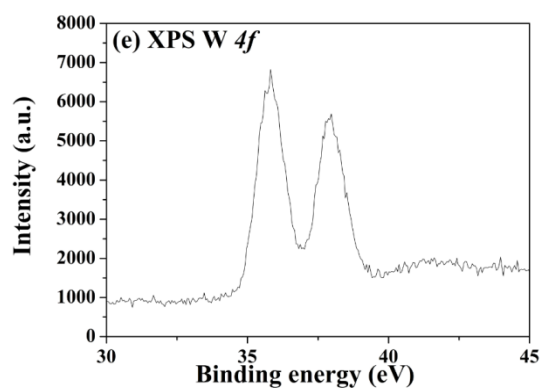

Figure S4 XPS spectrum of W 4f of the rGO/CdS/H<sub>2</sub>W<sub>12</sub> film.

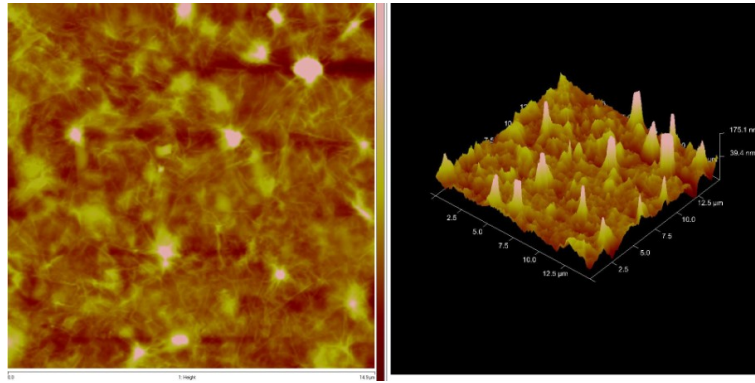

**Figure S5** AFM image of (rGO/CdS/H<sub>2</sub>W12)<sub>6</sub> films modified silicon substrate.

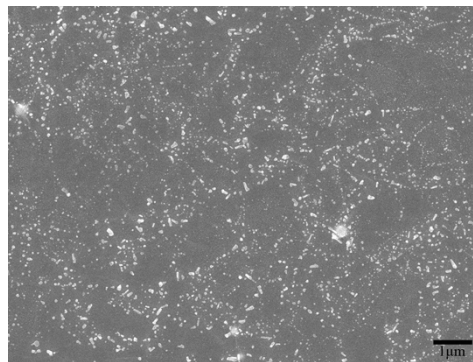

**Figure S6** SEM image of (rGO/CdS/H<sub>2</sub>W12)<sub>6</sub> films modified silicon substrate.

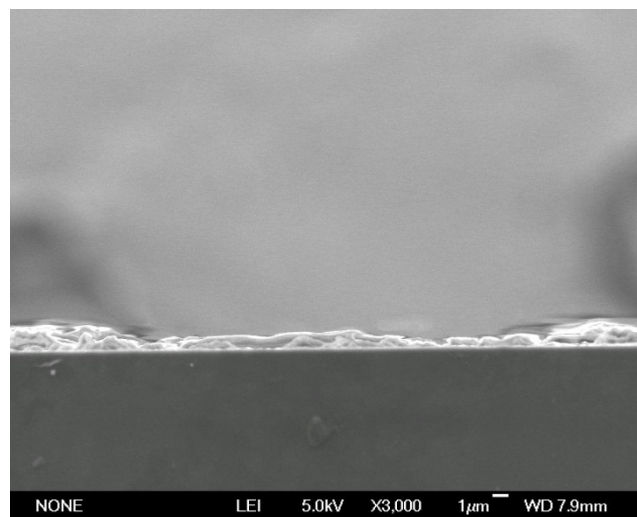

**Figure S7** Cross section image of (rGO/CdS/H<sub>2</sub>W12)<sub>6</sub> films on silicon substrate

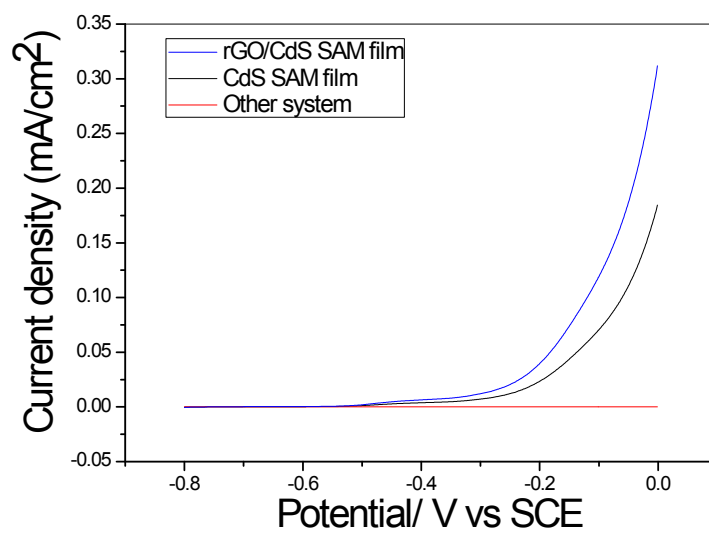

Figure S7, Comparison of PEC curves of CdS SAM film with rGO/SAM film and other system (rGO, H2W12, rGO/H2W12 SAM film)

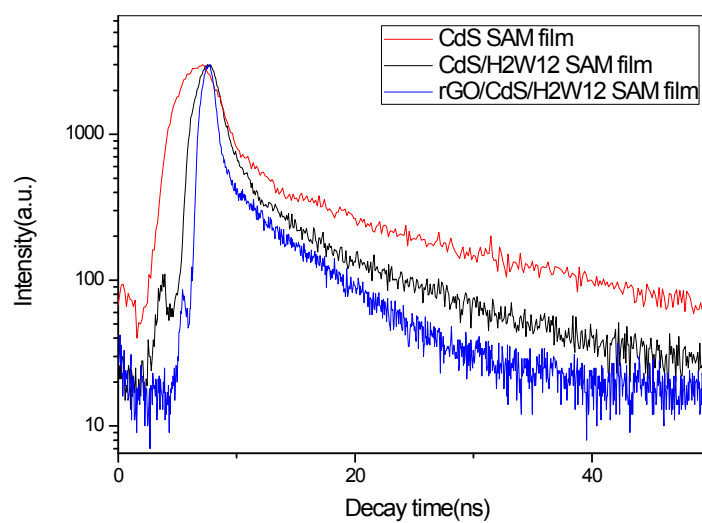

Figure S8, Time-resolved luminescence decay of different SAM films.
